# Supplementary material for: A comparison of methods used to unveil the genetic and metabolic pool in the built environment
Source: PubMed Central journal article supplement (PMC5902888; doi:10.1186/s40168-018-0453-0), 2018-04-16
Supplement: 40168_2018_453_MOESM10_ESM.pdf [file 40168_2018_453_MOESM10_ESM.pdf]

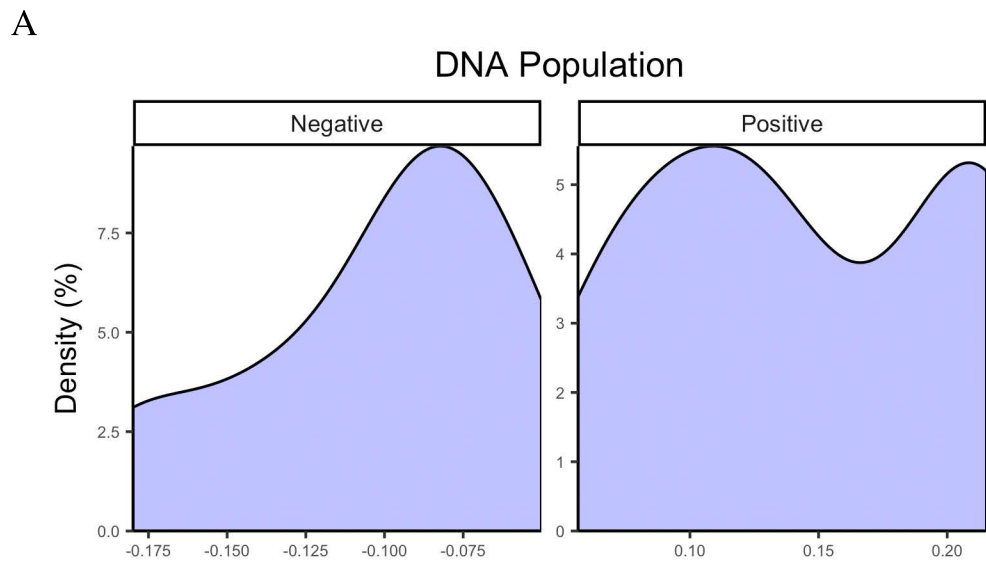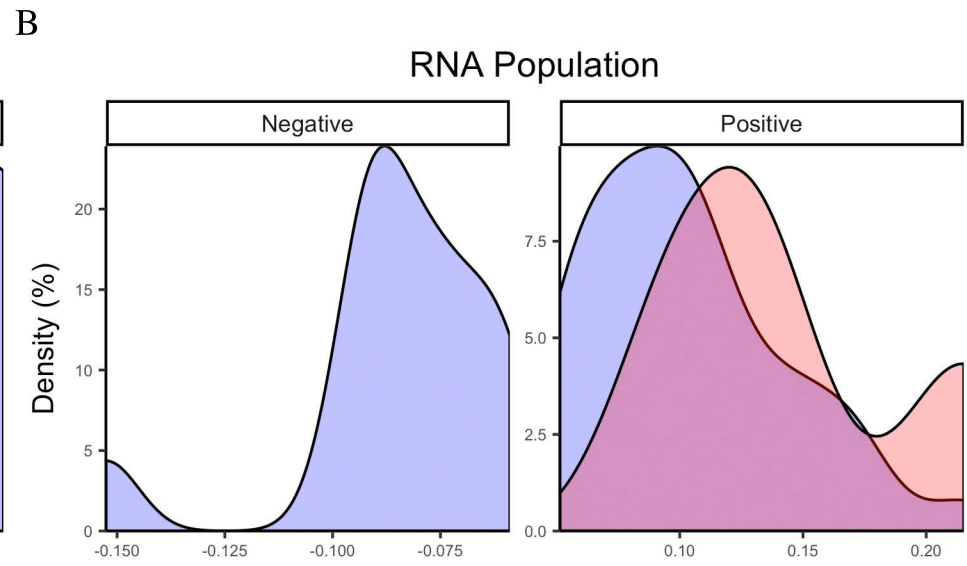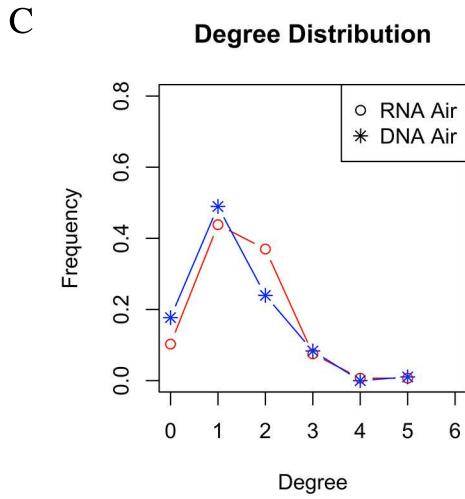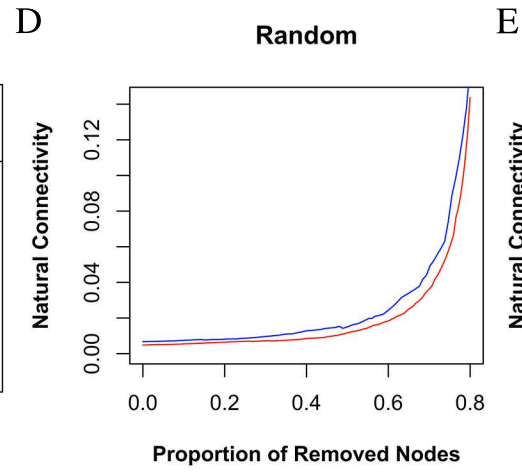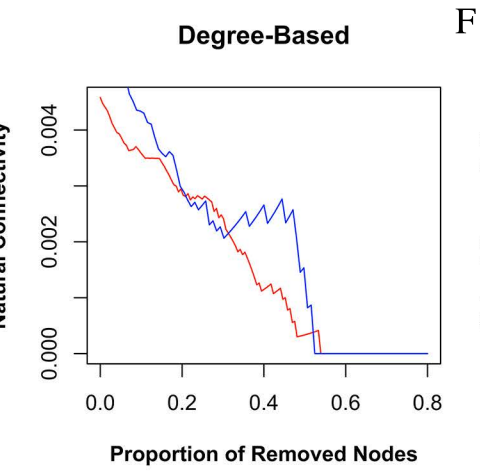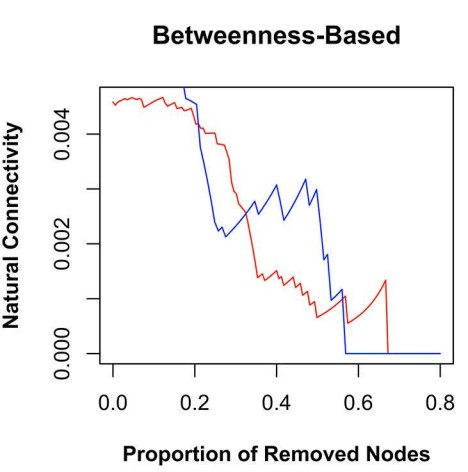

Additional file 10: Figure S2
